# Supplementary material
Source: publisher figshare collection journal article supplement (https://tandf.figshare.com/articles/dataset/_/19095298)
Supplement: Supplementary file 1 [file 1]

**Table S2.** Weighted odds ratios (95% confidence intervals) of depressive symptoms across quartiles of urinary phytoestrogens concentrations stratified by race, NHANES 2007–2010 (N = 3,430)

| <b>Phytoestrogen<br/>Concentrations (µg/g<br/>Creatinine)</b> | <b>Cases/Participants</b> | <b>Model 3 <sup>a</sup></b> |
|---------------------------------------------------------------|---------------------------|-----------------------------|
| <b>Mexican American</b>                                       |                           |                             |
| <b>Lignans</b>                                                |                           |                             |
| <b>Q1 (&lt; 141.15)</b>                                       | 19/164                    | 1.00 (reference)            |
| <b>Q2 (141.15 to &lt; 416.94)</b>                             | 24/185                    | 0.73 (0.29–1.89)            |
| <b>Q3 (416.94 to &lt; 950.27)</b>                             | 17/157                    | 0.78 (0.29–2.11)            |
| <b>Q4 (≥ 950.27)</b>                                          | 12/159                    | 0.42 (0.15–1.20)            |
| <b>Enterolactone</b>                                          |                           |                             |
| <b>Q1 (&lt; 87.33)</b>                                        | 16/155                    | 1.00 (reference)            |
| <b>Q2 (87.33 to &lt; 330.71)</b>                              | 24/178                    | 1.00 (0.39–2.59)            |
| <b>Q3 (330.71 to &lt; 825.81)</b>                             | 20/173                    | 0.83 (0.31–2.21)            |
| <b>Q4 (≥ 825.81)</b>                                          | 12/159                    | 0.47 (0.16–1.38)            |
| <b>Enterodiol</b>                                             |                           |                             |
| <b>Q1 (&lt; 14.86)</b>                                        | 27/195                    | 1.00 (reference)            |
| <b>Q2 (14.86 to &lt; 40.98)</b>                               | 21/185                    | 1.35 (0.70–2.58)            |
| <b>Q3 (40.98 to &lt; 101.82)</b>                              | 11/152                    | 0.50 (0.24–1.05)            |
| <b>Q4 (≥ 101.82)</b>                                          | 13/133                    | 0.58 (0.19–1.77)            |
| <b>Isoflavones</b>                                            |                           |                             |
| <b>Q1 (&lt; 41.23)</b>                                        | 24/216                    | 1.00 (reference)            |
| <b>Q2 (41.23 to &lt; 98.64)</b>                               | 20/159                    | 0.83 (0.37–1.89)            |
| <b>Q3 (98.64 to &lt; 337.92)</b>                              | 12/136                    | 0.65 (0.21–2.01)            |
| <b>Q4 (≥ 337.92)</b>                                          | 16/154                    | 0.64 (0.22–1.83)            |
| <b>Daidzein</b>                                               |                           |                             |
| <b>Q1 (&lt; 17.41)</b>                                        | 20/192                    | 1.00 (reference)            |
| <b>Q2 (17.41 to &lt; 49.05)</b>                               | 21/171                    | 0.96 (0.41–2.26)            |
| <b>Q3 (49.05 to &lt; 188.66)</b>                              | 15/144                    | 1.07 (0.43–2.65)            |
| <b>Q4 (≥ 188.66)</b>                                          | 16/158                    | 0.80 (0.28–2.26)            |
| <b>O-DMA</b>                                                  |                           |                             |
| <b>Q1 (&lt; 0.67)</b>                                         | 25/205                    | 1.00 (reference)            |
| <b>Q2 (0.67 to &lt; 2.78)</b>                                 | 17/183                    | 0.65 (0.26–1.60)            |
| <b>Q3 (2.78 to &lt; 18.63)</b>                                | 14/143                    | 0.81 (0.29–2.26)            |
| <b>Q4 (≥ 18.63)</b>                                           | 16/134                    | 0.81 (0.30–2.17)            |
| <b>Equol</b>                                                  |                           |                             |
| <b>Q1 (&lt; 2.96)</b>                                         | 25/219                    | 1.00 (reference)            |
| <b>Q2 (2.96 to &lt; 6.14)</b>                                 | 27/207                    | 0.95 (0.39–2.36)            |
| <b>Q3 (6.14 to &lt; 12.84)</b>                                | 16/153                    | 0.54 (0.19–1.56)            |
| <b>Q4 (≥ 12.84)</b>                                           | 4/86                      | 0.03 (0.01–0.29)**          |
| <b>Genistein</b>                                              |                           |                             |
| <b>Q1 (&lt; 8.91)</b>                                         | 21/181                    | 1.00 (reference)            |

|                                   |        |                    |
|-----------------------------------|--------|--------------------|
| <b>Q2 (8.91 to &lt; 23.35)</b>    | 18/175 | 1.28 (0.61–2.71)   |
| <b>Q3 (23.35 to &lt; 86.00)</b>   | 20/165 | 0.81 (0.29–2.25)   |
| <b>Q4 (≥ 86.00)</b>               | 13/144 | 0.82 (0.28–2.41)   |
| <b>Non-Hispanic White</b>         |        |                    |
| <b>Lignans</b>                    |        |                    |
| <b>Q1 (&lt; 141.15)</b>           | 45/363 | 1.00 (reference)   |
| <b>Q2 (141.15 to &lt; 416.94)</b> | 31/370 | 1.17 (0.61–2.25)   |
| <b>Q3 (416.94 to &lt; 950.27)</b> | 25/396 | 0.65 (0.31–1.35)   |
| <b>Q4 (≥ 950.27)</b>              | 21/476 | 0.38 (0.22–0.67)** |
| <b>Enterolactone</b>              |        |                    |
| <b>Q1 (&lt; 87.33)</b>            | 48/378 | 1.00 (reference)   |
| <b>Q2 (87.33 to &lt; 330.71)</b>  | 28/366 | 0.94 (0.42–2.11)   |
| <b>Q3 (330.71 to &lt; 825.81)</b> | 25/382 | 0.62 (0.30–1.31)   |
| <b>Q4 (≥ 825.81)</b>              | 21/479 | 0.35 (0.19–0.63)** |
| <b>Enterodiol</b>                 |        |                    |
| <b>Q1 (&lt; 14.86)</b>            | 31/310 | 1.00 (reference)   |
| <b>Q2 (14.86 to &lt; 40.98)</b>   | 29/387 | 1.40 (0.61–3.22)   |
| <b>Q3 (40.98 to &lt; 101.82)</b>  | 35/436 | 1.15 (0.46–2.89)   |
| <b>Q4 (≥ 101.82)</b>              | 27/472 | 1.20 (0.58–2.48)   |
| <b>Isoflavones</b>                |        |                    |
| <b>Q1 (&lt; 41.23)</b>            | 24/320 | 1.00 (reference)   |
| <b>Q2 (41.23 to &lt; 98.64)</b>   | 28/453 | 0.61 (0.29–1.31)   |
| <b>Q3 (98.64 to &lt; 337.92)</b>  | 38/429 | 1.37 (0.58–3.26)   |
| <b>Q4 (≥ 337.92)</b>              | 32/403 | 1.03 (0.53–2.00)   |
| <b>Daidzein</b>                   |        |                    |
| <b>Q1 (&lt; 17.41)</b>            | 22/361 | 1.00 (reference)   |
| <b>Q2 (17.41 to &lt; 49.05)</b>   | 36/424 | 1.09 (0.50–2.38)   |
| <b>Q3 (49.05 to &lt; 188.66)</b>  | 32/420 | 1.25 (0.52–3.00)   |
| <b>Q4 (≥ 188.66)</b>              | 32/400 | 1.25 (0.67–2.35)   |
| <b>O-DMA</b>                      |        |                    |
| <b>Q1 (&lt; 0.67)</b>             | 27/339 | 1.00 (reference)   |
| <b>Q2 (0.67 to &lt; 2.78)</b>     | 31/406 | 1.07 (0.50–2.30)   |
| <b>Q3 (2.78 to &lt; 18.63)</b>    | 32/443 | 1.33 (0.76–2.32)   |
| <b>Q4 (≥ 18.63)</b>               | 32/417 | 1.30 (0.67–2.51)   |
| <b>Equol</b>                      |        |                    |
| <b>Q1 (&lt; 2.96)</b>             | 25/262 | 1.00 (reference)   |
| <b>Q2 (2.96 to &lt; 6.14)</b>     | 18/346 | 0.55 (0.27–1.12)   |
| <b>Q3 (6.14 to &lt; 12.84)</b>    | 40/438 | 1.01 (0.50–2.06)   |
| <b>Q4 (≥ 12.84)</b>               | 39/559 | 0.83 (0.43–1.61)   |
| <b>Genistein</b>                  |        |                    |
| <b>Q1 (&lt; 8.91)</b>             | 25/368 | 1.00 (reference)   |
| <b>Q2 (8.91 to &lt; 23.35)</b>    | 28/410 | 0.85 (0.30–2.43)   |
| <b>Q3 (23.35 to &lt; 86.00)</b>   | 36/419 | 1.02 (0.40–2.63)   |
| <b>Q4 (≥ 86.00)</b>               | 33/408 | 1.03 (0.52–2.04)   |

|                                   |        |                  |
|-----------------------------------|--------|------------------|
| <b>Non-Hispanic Black</b>         |        |                  |
| <b>Lignans</b>                    |        |                  |
| <b>Q1 (&lt; 141.15)</b>           | 21/193 | 1.00 (reference) |
| <b>Q2 (141.15 to &lt; 416.94)</b> | 12/168 | 0.56 (0.20–1.54) |
| <b>Q3 (416.94 to &lt; 950.27)</b> | 17/196 | 1.04 (0.57–1.88) |
| <b>Q4 (≥ 950.27)</b>              | 6/106  | 0.53 (0.18–1.50) |
| <b>Enterolactone</b>              |        |                  |
| <b>Q1 (&lt; 87.33)</b>            | 19/174 | 1.00 (reference) |
| <b>Q2 (87.33 to &lt; 330.71)</b>  | 17/178 | 0.96 (0.41–2.24) |
| <b>Q3 (330.71 to &lt; 825.81)</b> | 13/202 | 0.66 (0.30–1.44) |
| <b>Q4 (≥ 825.81)</b>              | 7/109  | 0.68 (0.26–1.74) |
| <b>Enterodiol</b>                 |        |                  |
| <b>Q1 (&lt; 14.86)</b>            | 20/211 | 1.00 (reference) |
| <b>Q2 (14.86 to &lt; 40.98)</b>   | 11/178 | 0.52 (0.22–1.20) |
| <b>Q3 (40.98 to &lt; 101.82)</b>  | 19/163 | 1.63 (0.79–3.34) |
| <b>Q4 (≥ 101.82)</b>              | 6/111  | 0.74 (0.27–2.02) |
| <b>Isoflavones</b>                |        |                  |
| <b>Q1 (&lt; 41.23)</b>            | 21/199 | 1.00 (reference) |
| <b>Q2 (41.23 to &lt; 98.64)</b>   | 12/138 | 0.54 (0.15–2.04) |
| <b>Q3 (98.64 to &lt; 337.92)</b>  | 14/167 | 0.80 (0.35–1.85) |
| <b>Q4 (≥ 337.92)</b>              | 9/159  | 0.68 (0.29–1.61) |
| <b>Daidzein</b>                   |        |                  |
| <b>Q1 (&lt; 17.41)</b>            | 20/186 | 1.00 (reference) |
| <b>Q2 (17.41 to &lt; 49.05)</b>   | 13/145 | 0.91 (0.34–2.39) |
| <b>Q3 (49.05 to &lt; 188.66)</b>  | 17/168 | 1.13 (0.44–2.89) |
| <b>Q4 (≥ 188.66)</b>              | 6/164  | 0.42 (0.14–1.28) |
| <b>O-DMA</b>                      |        |                  |
| <b>Q1 (&lt; 0.67)</b>             | 21/166 | 1.00 (reference) |
| <b>Q2 (0.67 to &lt; 2.78)</b>     | 12/150 | 0.61 (0.24–1.57) |
| <b>Q3 (2.78 to &lt; 18.63)</b>    | 12/176 | 0.78 (0.27–2.26) |
| <b>Q4 (≥ 18.63)</b>               | 11/171 | 0.66 (0.28–1.56) |
| <b>Equol</b>                      |        |                  |
| <b>Q1 (&lt; 2.96)</b>             | 21/248 | 1.00 (reference) |
| <b>Q2 (2.96 to &lt; 6.14)</b>     | 13/180 | 0.63 (0.20–1.93) |
| <b>Q3 (6.14 to &lt; 12.84)</b>    | 13/143 | 0.79 (0.28–2.22) |
| <b>Q4 (≥ 12.84)</b>               | 9/92   | 0.89 (0.30–2.63) |
| <b>Genistein</b>                  |        |                  |
| <b>Q1 (&lt; 8.91)</b>             | 22/203 | 1.00 (reference) |
| <b>Q2 (8.91 to &lt; 23.35)</b>    | 12/155 | 0.46 (0.16–1.35) |
| <b>Q3 (23.35 to &lt; 86.00)</b>   | 12/144 | 0.76 (0.33–1.76) |
| <b>Q4 (≥ 86.00)</b>               | 10/161 | 0.70 (0.28–1.74) |
| <b>Other Race</b>                 |        |                  |
| <b>Lignans</b>                    |        |                  |
| <b>Q1 (&lt; 141.15)</b>           | 17/138 | 1.00 (reference) |

|                                      |        |                   |
|--------------------------------------|--------|-------------------|
| <b>Q2 (141.15 to &lt; 416.94)</b>    | 9/134  | 0.58 (0.17–1.96)  |
| <b>Q3 (416.94 to &lt; 950.27)</b>    | 12/109 | 2.30 (0.89–5.93)  |
| <b>Q4 (<math>\geq</math> 950.27)</b> | 13/116 | 1.00 (0.34–2.93)  |
| <b>Enterolactone</b>                 |        |                   |
| <b>Q1 (&lt; 87.33)</b>               | 19/151 | 1.00 (reference)  |
| <b>Q2 (87.33 to &lt; 330.71)</b>     | 9/135  | 0.34 (0.06–2.08)  |
| <b>Q3 (330.71 to &lt; 825.81)</b>    | 11/101 | 1.58 (0.48–5.23)  |
| <b>Q4 (<math>\geq</math> 825.81)</b> | 12/110 | 0.77 (0.21–2.80)  |
| <b>Enterodiol</b>                    |        |                   |
| <b>Q1 (&lt; 14.86)</b>               | 14/142 | 1.00 (reference)  |
| <b>Q2 (14.86 to &lt; 40.98)</b>      | 11/107 | 0.91 (0.28–2.94)  |
| <b>Q3 (40.98 to &lt; 101.82)</b>     | 7/107  | 0.35 (0.09–1.40)  |
| <b>Q4 (<math>\geq</math> 101.82)</b> | 19/141 | 1.01 (0.29–3.46)  |
| <b>Isoflavones</b>                   |        |                   |
| <b>Q1 (&lt; 41.23)</b>               | 9/123  | 1.00 (reference)  |
| <b>Q2 (41.23 to &lt; 98.64)</b>      | 14/107 | 1.81 (0.65–5.07)  |
| <b>Q3 (98.64 to &lt; 337.92)</b>     | 12/126 | 0.32 (0.11–0.97)* |
| <b>Q4 (<math>\geq</math> 337.92)</b> | 16/141 | 1.83 (0.50–6.72)  |
| <b>Daidzein</b>                      |        |                   |
| <b>Q1 (&lt; 17.41)</b>               | 11/119 | 1.00 (reference)  |
| <b>Q2 (17.41 to &lt; 49.05)</b>      | 9/117  | 1.02 (0.26–3.98)  |
| <b>Q3 (49.05 to &lt; 188.66)</b>     | 15/126 | 2.09 (0.80–5.45)  |
| <b>Q4 (<math>\geq</math> 188.66)</b> | 16/135 | 1.39 (0.44–4.39)  |
| <b>O-DMA</b>                         |        |                   |
| <b>Q1 (&lt; 0.67)</b>                | 13/148 | 1.00 (reference)  |
| <b>Q2 (0.67 to &lt; 2.78)</b>        | 11/119 | 1.40 (0.27–7.36)  |
| <b>Q3 (2.78 to &lt; 18.63)</b>       | 8/95   | 1.24 (0.20–7.82)  |
| <b>Q4 (<math>\geq</math> 18.63)</b>  | 19/135 | 1.44 (0.28–7.58)  |
| <b>Equol</b>                         |        |                   |
| <b>Q1 (&lt; 2.96)</b>                | 12/129 | 1.00 (reference)  |
| <b>Q2 (2.96 to &lt; 6.14)</b>        | 14/124 | 1.09 (0.41–2.90)  |
| <b>Q3 (6.14 to &lt; 12.84)</b>       | 15/124 | 1.37 (0.38–4.96)  |
| <b>Q4 (<math>\geq</math> 12.84)</b>  | 10/120 | 0.36 (0.13–1.02)  |
| <b>Genistein</b>                     |        |                   |
| <b>Q1 (&lt; 8.91)</b>                | 9/106  | 1.00 (reference)  |
| <b>Q2 (8.91 to &lt; 23.35)</b>       | 12/117 | 1.80 (0.70–4.60)  |
| <b>Q3 (23.35 to &lt; 86.00)</b>      | 18/130 | 1.20 (0.33–4.37)  |
| <b>Q4 (<math>\geq</math> 86.00)</b>  | 12/144 | 2.56 (0.51–12.89) |

Calculated using logistic regression. <sup>a</sup> Model 3 further adjusted for age, gender, educational level, PIR, marital status, smoking status, drinking status, diabetes, hypertension, BMI, work physical activity, recreational physical activity, dietary intake including caffeine, total saturated fatty acids, total energy, EPA, DHA, and calcium. \* $P < 0.05$ ; \*\* $P < 0.01$ .
