# Supplementary material
Source: publisher figshare collection journal article supplement (https://tandf.figshare.com/articles/dataset/_/19095298)
Supplement: Supplementary file 2 [file 1]

**Table S1.** The classifications of covariates

| Covariates                                            | Classifications                                                                         |
|-------------------------------------------------------|-----------------------------------------------------------------------------------------|
| Gender                                                | Female; Male                                                                            |
| Age (year)                                            | 18-39; 40-59; $\geq 60$                                                                 |
| Marital status                                        | Never married/widowed/divorced/separated; Married/living with partner                   |
| Race                                                  | Mexican American; Non-Hispanic White; Non-Hispanic Black; Other Hispanic; Other race    |
| Poverty income ratio (PIR)                            | $< 1$ (living below poverty level), $\geq 1$ (living above poverty level)               |
| Educational level                                     | Below high school; High school; Above high school;                                      |
| Body mass index                                       | $< 25 \text{ kg/m}^2$ ; $25 \text{ to } < 30 \text{ kg/m}^2$ ; $\geq 30 \text{ kg/m}^2$ |
| Smoked at least 100 cigarettes in life                | No; Yes                                                                                 |
| Had at least 12 alcohol drinks/year                   | No; Yes                                                                                 |
| Hypertension                                          | No; Yes                                                                                 |
| Diabetes                                              | No; Yes                                                                                 |
| Work physical activity                                | Moderate; Vigorous; Other                                                               |
| Recreational physical activity                        | Moderate; Vigorous; Other                                                               |
| Total energy intake (kcal/d) <sup>a</sup>             | Continuous                                                                              |
| Caffeine intake (mg/d) <sup>a</sup>                   | Continuous                                                                              |
| Total saturated fatty acids intake (g/d) <sup>a</sup> | Continuous                                                                              |
| Eicosapentaenoic acid (EPA) (g/d) <sup>a</sup>        | Continuous                                                                              |
| Docosahexaenoic acid (DHA) (g/d) <sup>a</sup>         | Continuous                                                                              |
| Calcium intake (mg/d) <sup>a</sup>                    | Continuous                                                                              |

<sup>a</sup> the mean dietary intake through two 24-h dietary data.
